# Supplementary material for: Polyoxovanadate catalysts for oxidation of 1-phenyl ethanol: from the discrete [V4O12]4− and [V10O28]6− anions to the anionic [V6O17]n4n− coordination polymer
Source: Royal Society of Chemistry journal article supplement (doi:10.1039/c8ce01237g), 2018-01-01
Supplement: c8ce01237g1.pdf [file c8ce01237g1.pdf]

## Supporting Information

# Polyoxovanadate catalysts for oxidation of 1-phenyl ethanol: from the discrete $[V_4O_{12}]^{4-}$ and $[V_{10}O_{28}]^{6-}$ anions, to the anionic $[V_6O_{17}]_n^{4n-}$ coordination polymer

Ke Wang,<sup>a, b</sup> Qiaofei Xu,<sup>a</sup> Pengtao Ma,<sup>a</sup> Chao Zhang,<sup>a</sup> Jingping Wang,<sup>a, \*</sup> and Jingyang Niu<sup>a, \*</sup>

<sup>a</sup> Henan Key Laboratory of Polyoxometalate Chemistry, College of Chemistry and Chemical Engineering, Henan University, Kaifeng, Henan 475004, P. R. China.

<sup>b</sup> Department of Pharmacy, Henan Medical College, Zhengzhou, Henan, 451191, P. R. China.

## CONTENTS

**Fig. S1.** The reported POVs with  $\{V_6O_{17}\}$  component. ( $\{[Co_4(2-pzc)_4]_n\}$  chains are omitted to highlight the POV rings in the structure of Ref 11).

**Fig. S2.** The reported different configurations of  $\{V_4O_{12}\}$  units.

**Table S1.** the BVS calculations of the vanadium and oxygen atoms in **1**.

**Fig. S3.** XPS for C 1s and Ru 3d. Peak deconvolution of the Ru 3d core-level energy region yields two ruthenium intensities (a) at 281.65 eV (3d5/2) and 285.80 eV (3d3/2) for Ru<sup>II</sup> 3d in **1** (b) 282.0 eV (3d5/2) and 286.65 eV (3d3/2) for Ru<sup>III</sup> 3d in **3**, 281.6 eV (3d5/2) and 285.85 eV (3d3/2) for Ru<sup>II</sup> 3d in **3**. Carbon from phen ligands and graphitic carbon intensity are located at 284.8 eV and 285.8 eV, respectively.

**Table S2.** the BVS calculations of the vanadium and oxygen atoms in **2**.

**Fig. S4.** Room-temperature EPR spectra of compounds **2** and **3**

**Table S3.** the BVS calculations of the vanadium and oxygen atoms in **3**.

**Fig. S5.** Supramolecular structure of compound **3** (a) C–H···O hydrogen bonding interactions in **3**. (b)  $\pi\cdots\pi$  interactions in **3**.

**Fig. S6.** The experiment and simulation PXRD patterns of (a) compound **1**; (b) compound **2**; (c) compound **3**.

**Fig. S7.** (a) TGA curve of compound **1**; (b) TGA curve of compound **2**. (c) TGA curve of compound **3**.

**Fig. S8.** IR spectra of (a) compound **1**, (b) compound **2**, and (c) compound **3**.

**Fig. S9.** IR spectra of **1** before and after the catalytic tests.

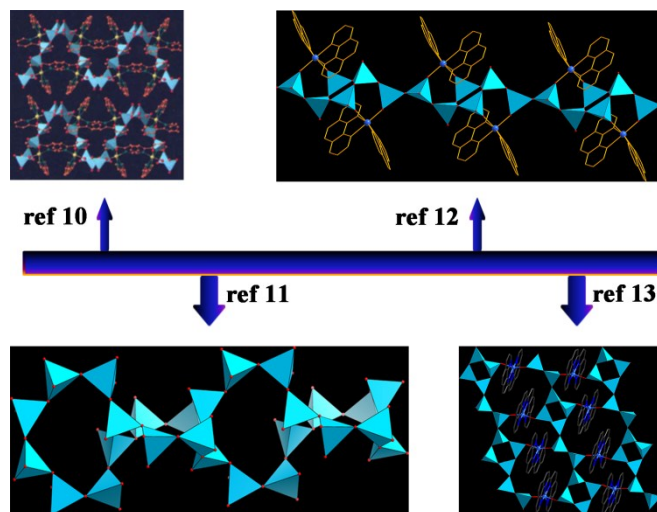

**Fig. S1.** The reported POVs with  $\{V_6O_{17}\}$  component. ( $\{[Co_4(2-pzc)_4]_n\}$  chains are omitted to highlight the POV rings in the structure of Ref 11).

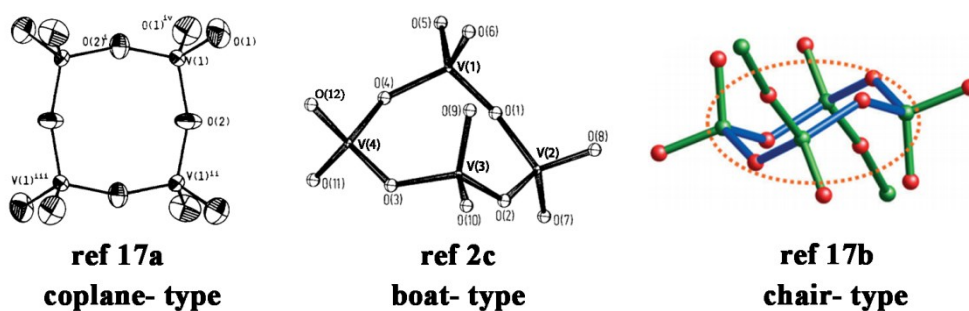

**Fig. S2.** The reported different configurations of  $\{V_4O_{12}\}$  units.

**Table S1.** the BVS calculations of the vanadium and oxygen atoms in **1**.

| Atom | BVS   |
|------|-------|
| V1   | 5.295 |
| V2   | 5.241 |
| O1   | 2.179 |
| O2   | 1.537 |
| O3   | 1.667 |
| O4   | 1.541 |
| O5   | 1.508 |
| O6   | 2.103 |

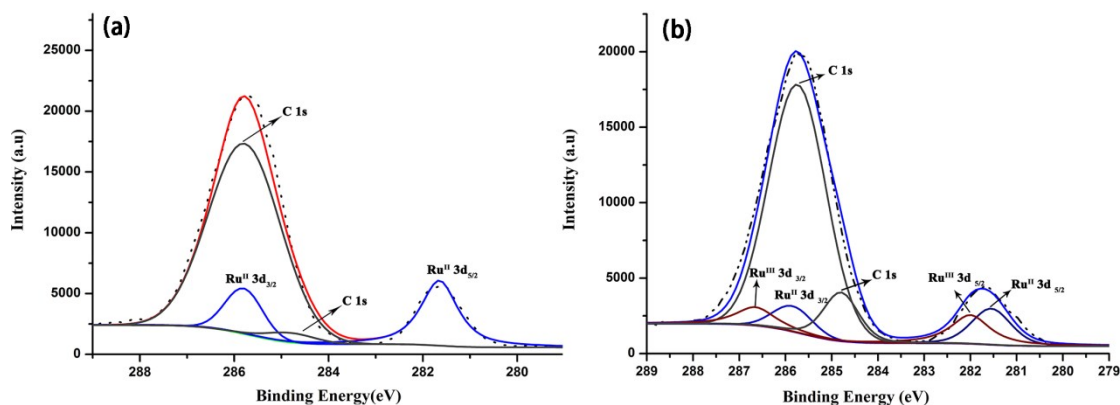

**Fig. S3.** XPS for C 1s and Ru 3d. Peak deconvolution of the Ru 3d core-level energy region yields two ruthenium intensities (a) at 281.65 eV (3d<sub>5/2</sub>) and 285.80 eV (3d<sub>3/2</sub>) for Ru<sup>II</sup> 3d in **1** (b) 282.0 eV (3d<sub>5/2</sub>) and 286.65 eV (3d<sub>3/2</sub>) for Ru<sup>III</sup> 3d in **3**, 281.6 eV (3d<sub>5/2</sub>) and 285.85 eV (3d<sub>3/2</sub>) for Ru<sup>II</sup> 3d in **3**. Carbon from phen ligands and graphitic carbon intensity are located at 284.8 eV and 285.8 eV, respectively.

**Table S2.** the BVS calculations of the vanadium and oxygen atoms in **2**.

| Atom | BVS   | Atom | BVS   | Atom | BVS   | Atom | BVS   |
|------|-------|------|-------|------|-------|------|-------|
| V1   | 5.073 | O1   | 1.908 | O6   | 1.671 | O11  | 1.948 |
| V2   | 5.059 | O2   | 1.754 | O7   | 1.809 | O12  | 1.869 |
| V3   | 5.043 | O3   | 1.740 | O8   | 1.919 | O13  | 1.371 |
| V4   | 5.110 | O4   | 1.908 | O9   | 1.826 | O14  | 1.938 |
| V5   | 5.126 | O5   | 2.004 | O10  | 1.745 |      |       |

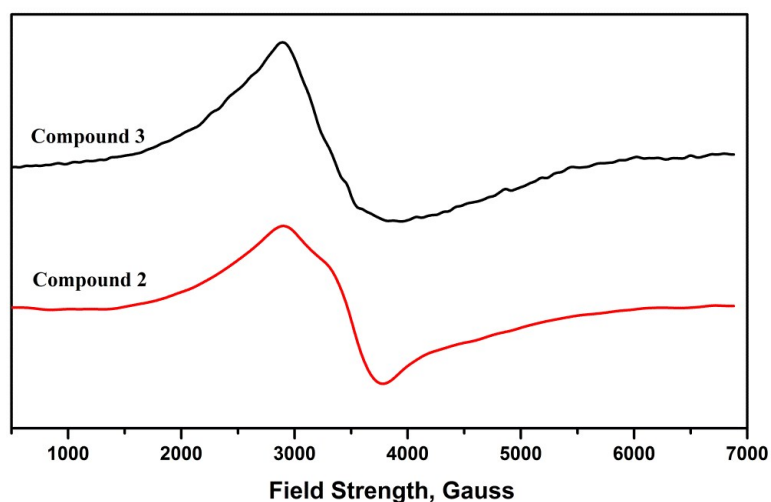

**Fig. S4.** Room-temperature EPR spectra of compounds **2** and **3**

**Table S3.** the BVS calculations of the vanadium and oxygen atoms in **3**.

| Atom | BVS   | Atom | BVS   | Atom | BVS   | Atom | BVS   |
|------|-------|------|-------|------|-------|------|-------|
| V1   | 5.303 | O1   | 1.694 | O7   | 1.847 | O13  | 1.759 |
| V2   | 5.372 | O2   | 1.694 | O8   | 1.754 | O14  | 2.083 |
| V3   | 5.721 | O3   | 2.152 | O9   | 2.226 | O15  | 2.178 |
| V4   | 5.382 | O4   | 1.764 | O10  | 1.658 | O16  | 1.997 |
| V5   | 5.332 | O5   | 2.170 | O11  | 1.712 | O17  | 1.618 |
| V6   | 5.486 | O6   | 2.183 | O12  | 2.107 |      |       |

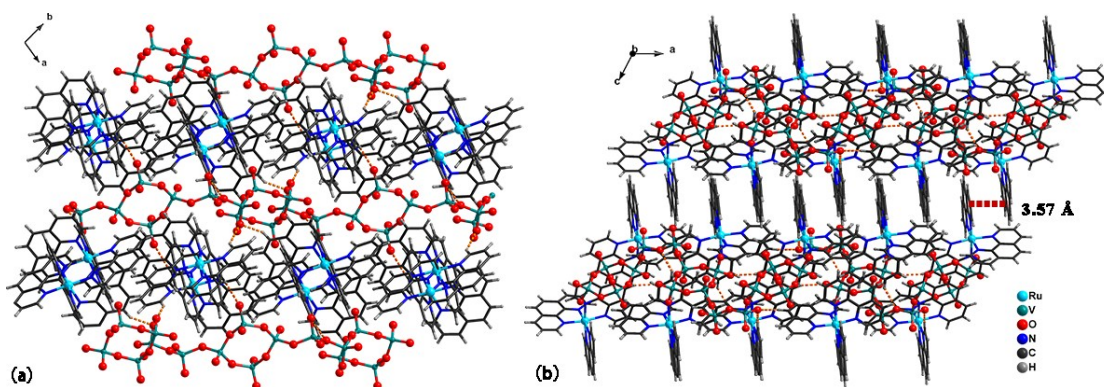

**Fig. S5.** Supramolecular structure of compound **3** (a) C-H...O hydrogen bonding interactions in **3**. (b)  $\pi$ ... $\pi$  interactions in **3**.

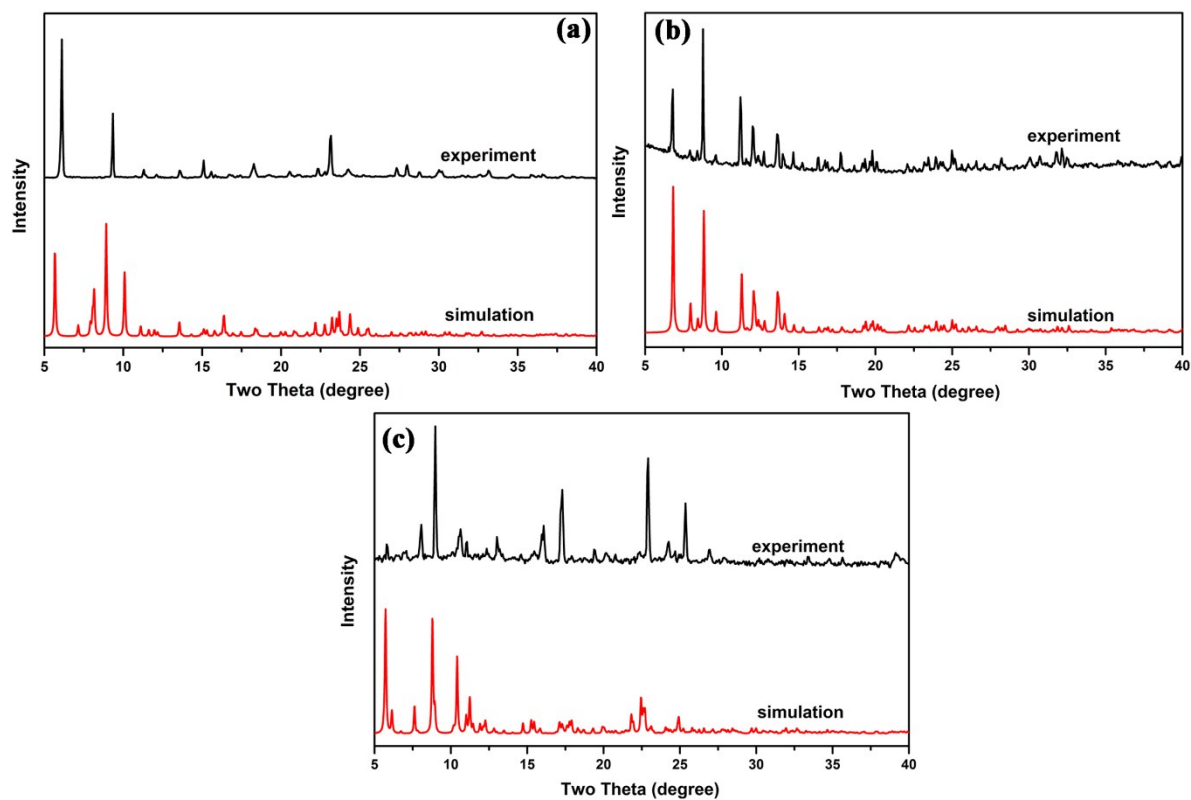

**Fig. S6.** The experiment and simulation PXRD patterns of (a) compound **1**; (b) compound **2**; (c) compound **3**.

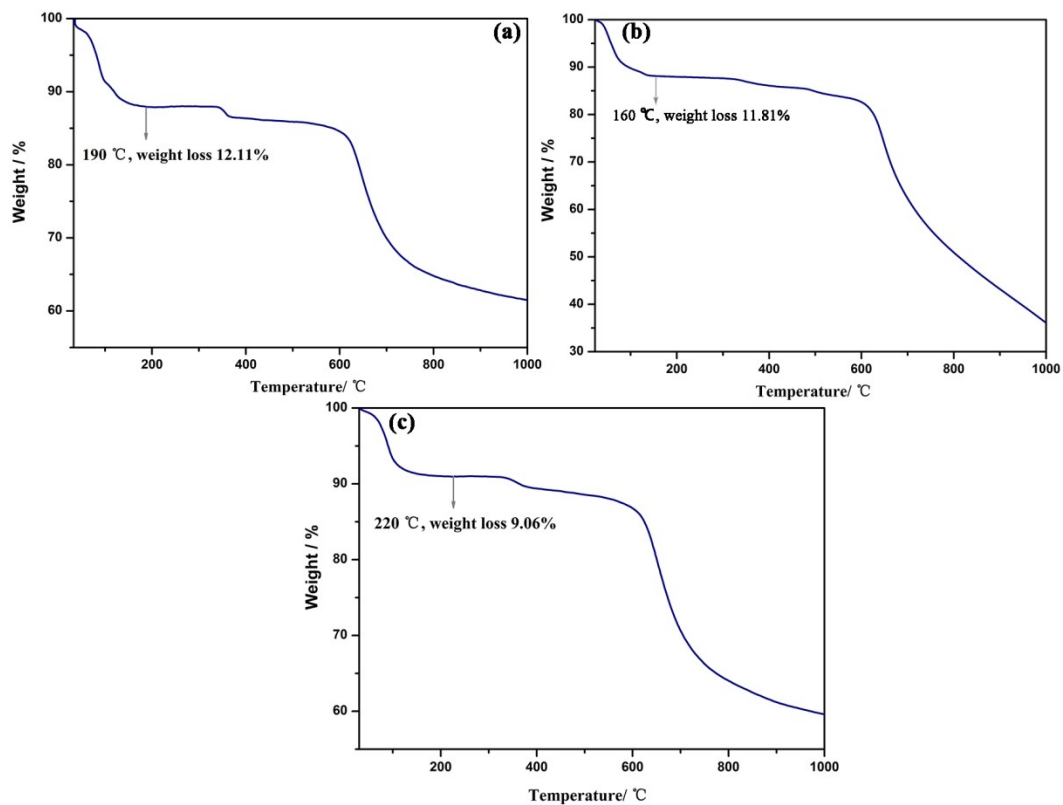

**Fig. S7.** (a) TGA curve of compound **1**; (b) TGA curve of compound **2**. (c) TGA curve of compound **3**

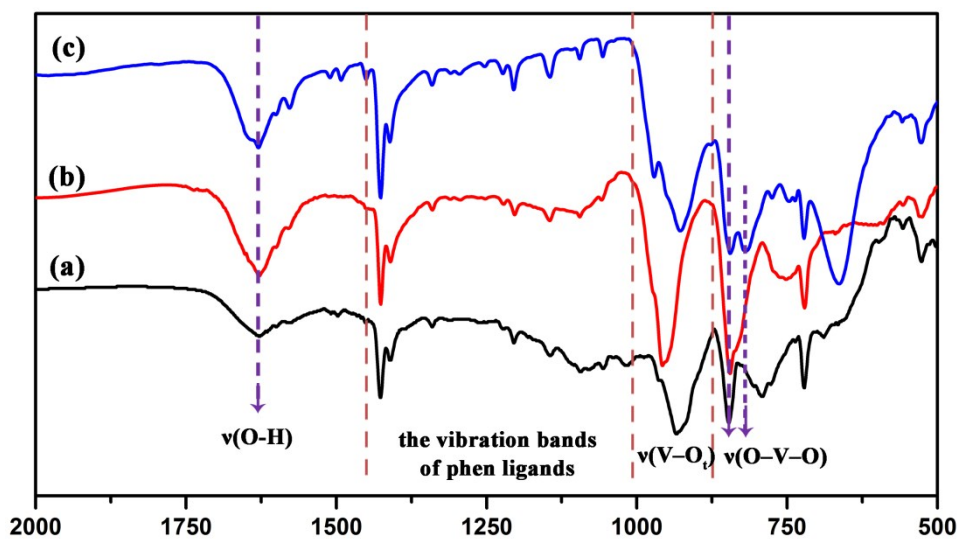

**Fig. S8.** IR spectra of (a) compound **1**, (b) compound **2**, and (c) compound **3**.

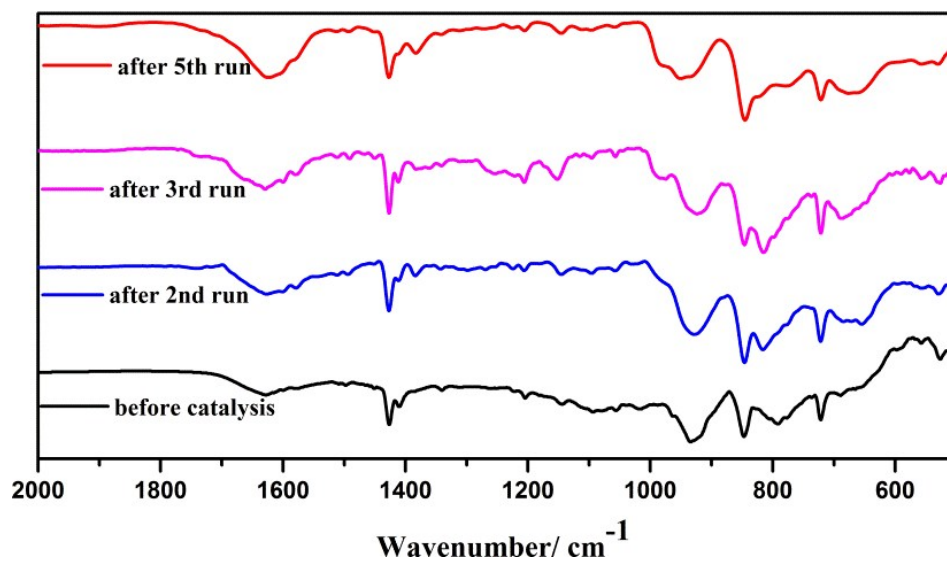

**Fig. S9.** IR spectra of **1** before and after the catalytic tests.
